# Supplementary material for: Genetic risk score in multiple sclerosis is associated with unique gut microbiome
Source: PubMed Central journal article supplement (PMC10533555; doi:10.1038/s41598-023-43217-4), 2023-09-27
Supplement: 41598_2023_43217_MOESM2_ESM.pdf [file 41598_2023_43217_MOESM2_ESM.pdf]

# Microbiome R markdown

## R Markdown

```
library(tidyverse)
library(ggplot2)
library(readxl)
library(ggpubr)
# Alpha indices
#Phylogenetic diversity index
#####
new_pd_faith<-read_excel("H:/CHG/Shukla_Sanjay/Noha/MS Gut Microbiome/16s manuscript with genetic risk :
ggplot(new_pd_faith, aes(x = SMTYPE, y = PD
, fill = SMTYPE)) + # Manually specified filling color
geom_boxplot(fatten=3) +
scale_fill_manual(values = c("royalblue4", "red")) +
theme(text = element_text(size=20)) +
geom_jitter(shape=16, position=position_jitter(0.2)) +
theme(legend.title = element_text(size=20)) +
theme(legend.text = element_text(size=15))
```

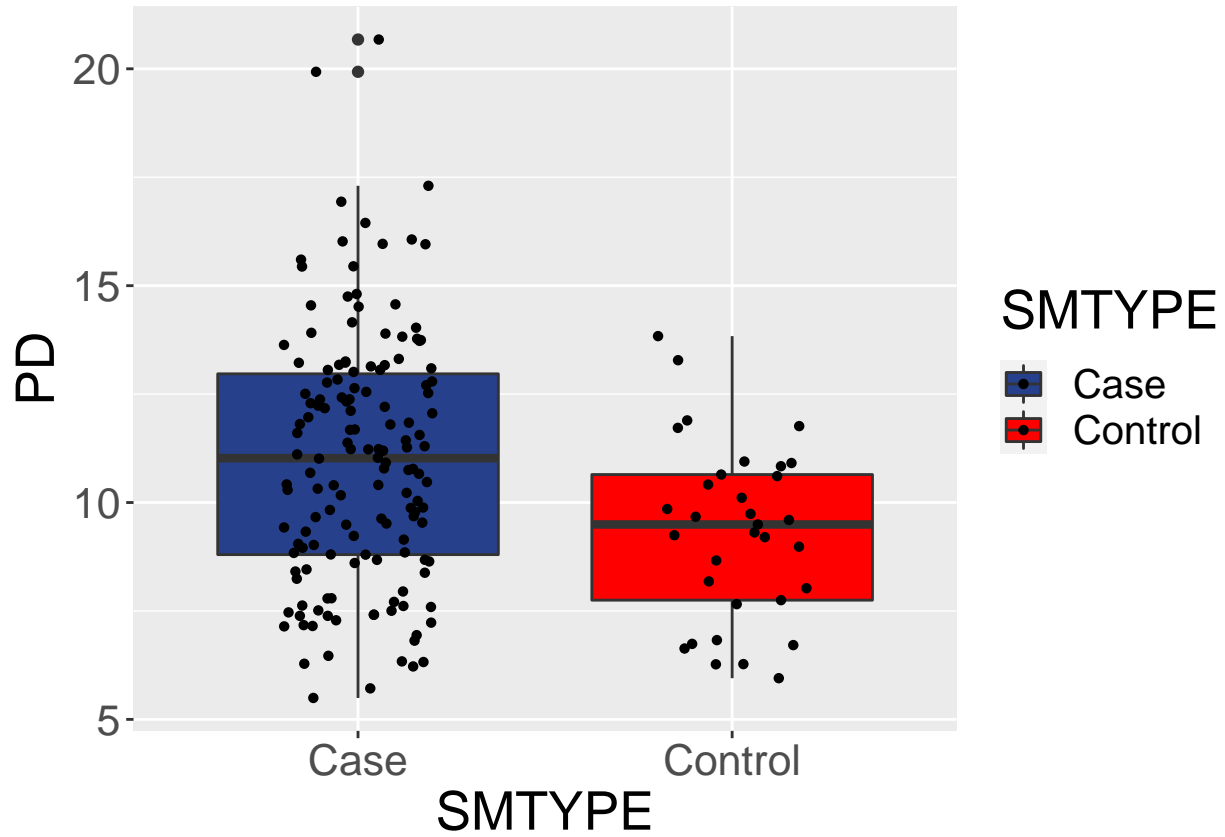

```

# pielou index
#####

Pielou=read.table(file="H:/CHG/Shukla_Sanjay/Noha/MS Gut Microbiome/16s manuscript with genetic risk sc
ggplot(Pielou, aes(x = SMTYPE, y = pielou_e, fill = SMTYPE)) + # Manually specified filling color
  geom_boxplot(fatten=5) +
  scale_fill_manual(values = c("royalblue4", "red", "purple")) +
  theme(text = element_text(size=20)) +
  geom_jitter(shape=16, position=position_jitter(0.2)) +
  theme(legend.title = element_text(size=20)) +
  theme(legend.text = element_text(size=15))

```

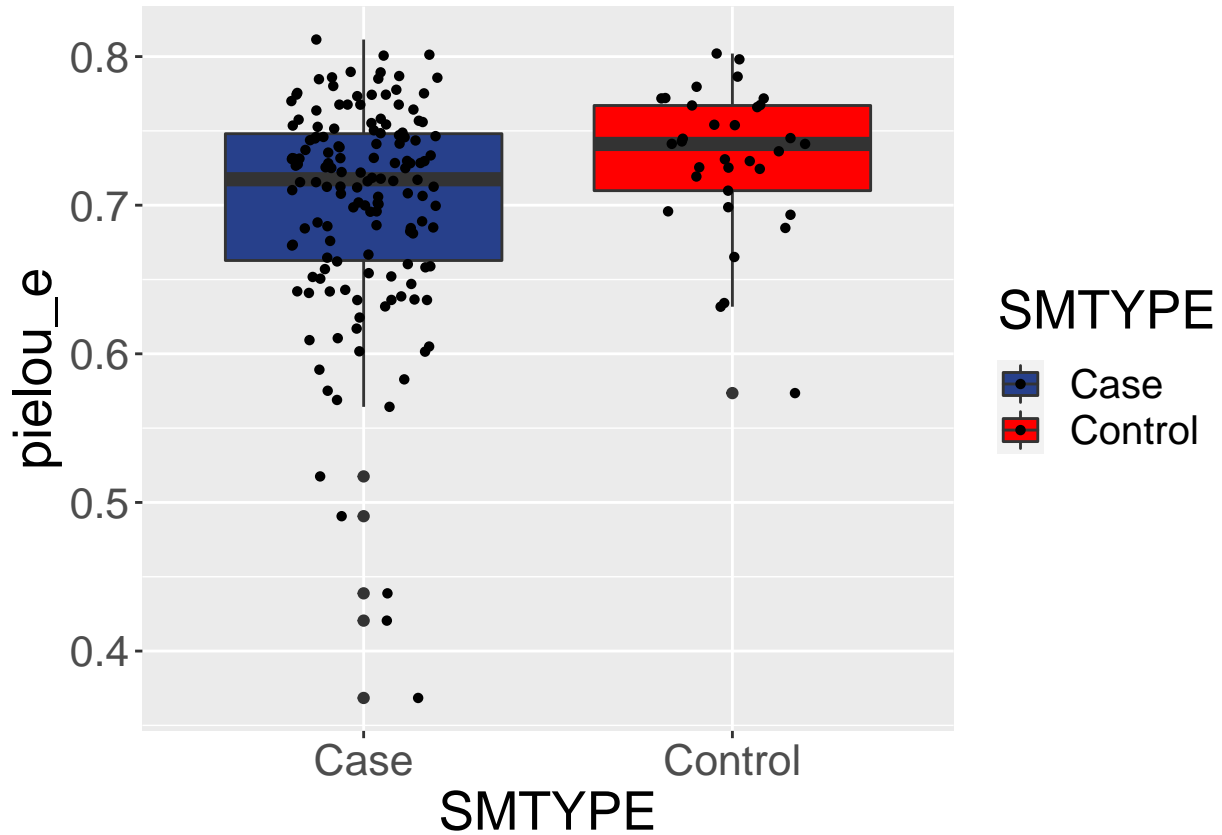

```
#####
# shannon
#####
shannon=read.table(file="M:/Genetic/Projects/Shukla_Microbiome_Seq/results/Robert/qiime2-2019.10/ms/MS_
ggplot(shannon, aes(x = category, y = shannon, fill = category)) + # Manually specified filling color
  geom_boxplot(fatten=5) +
  scale_fill_manual(values = c("royalblue4", "red", "purple")) +
  theme(text = element_text(size=20)) +
  geom_jitter(shape=16, position=position_jitter(0.2)) +
  theme(legend.title = element_text(size=20)) +
  theme(legend.text = element_text(size=15))
```

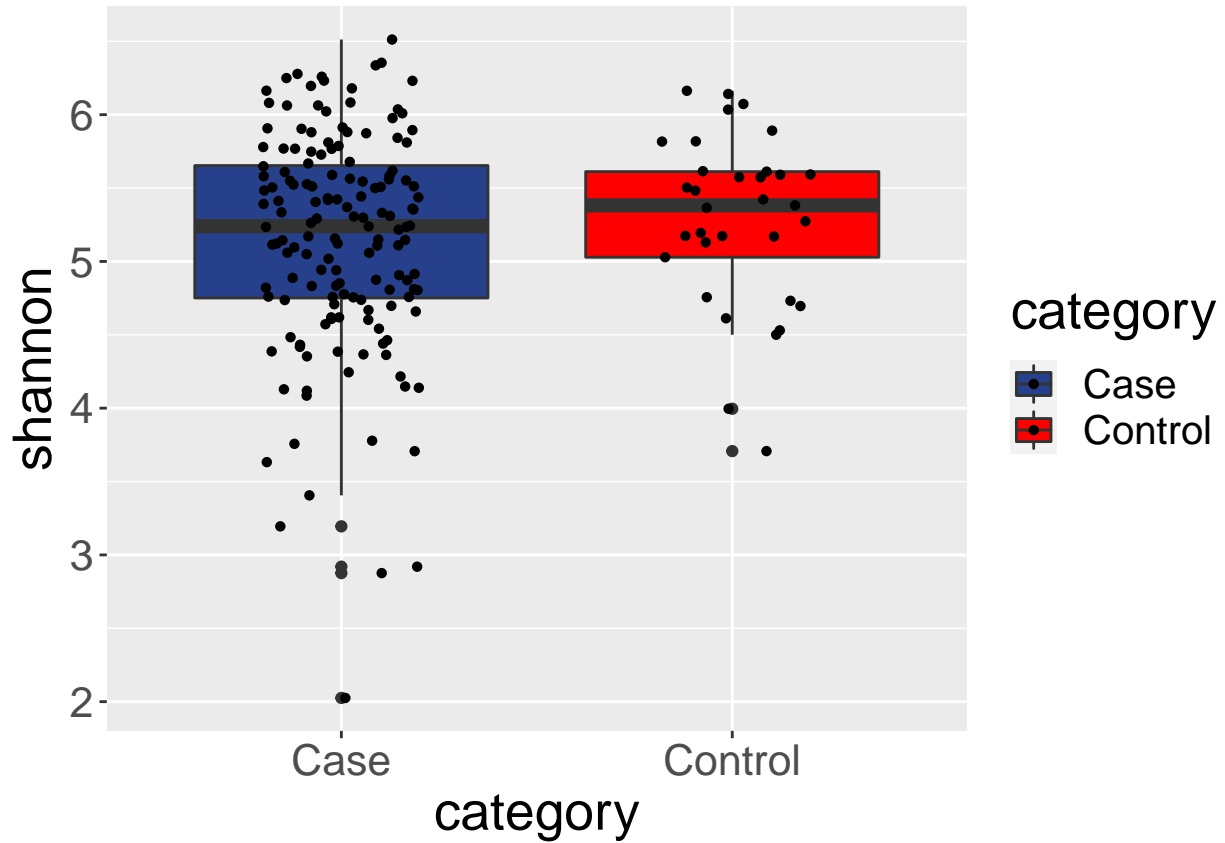

```

# Phylogenetic diversity between groups 1, group 3, and control
#####
new_pd_faith<-read_excel("H:/CHG/Shukla_Sanjay/Noha/MS Gut Microbiome/16s manuscript with genetic risk :
ggplot(new_pd_faith, aes(x = Group, y = PD , fill = Group)) + # Manually specified filling color
  geom_boxplot(fatten=3) +
  scale_fill_manual(values = c("RED", "Royal blue", "Medium Blue")) +
  theme(text = element_text(size=20)) +
geom_jitter(shape=16, position=position_jitter(0.2)) +
  theme(legend.title = element_text(size=20)) +
  theme(legend.text = element_text(size=15))

```

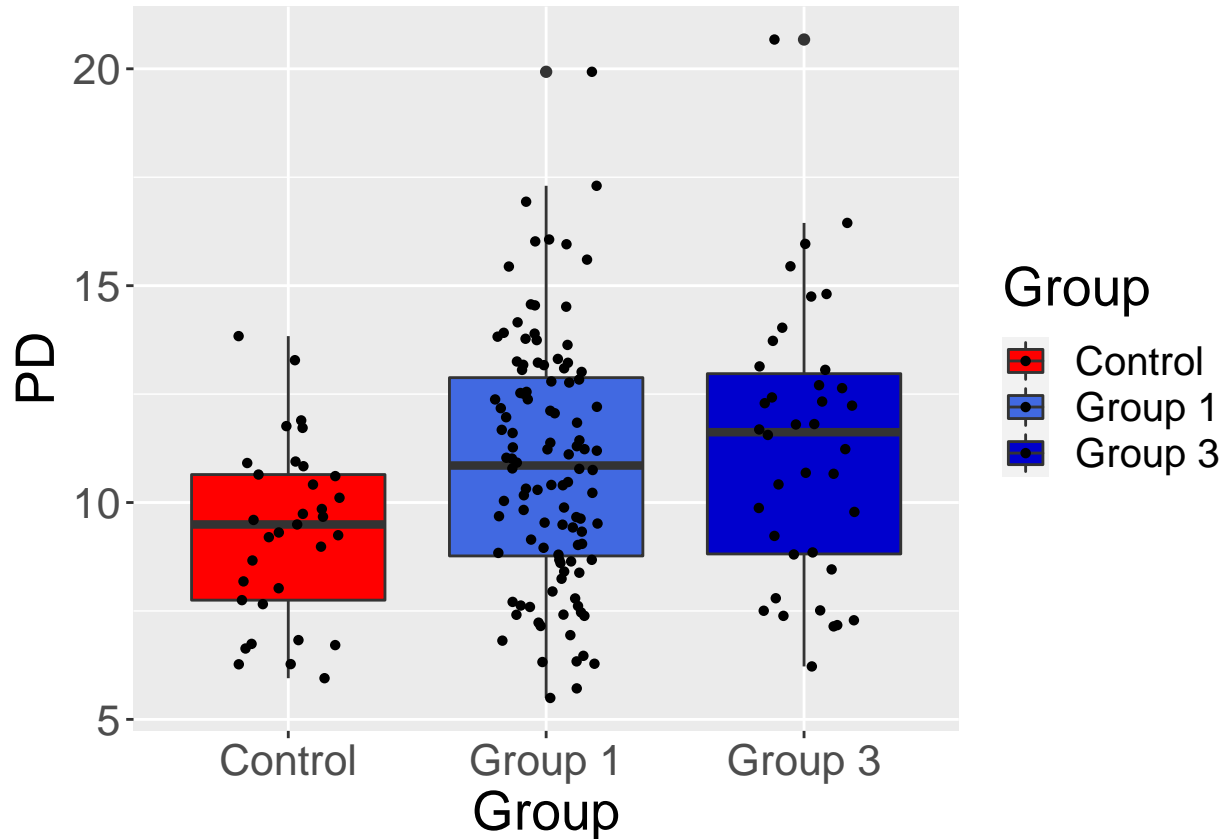

```

library(ggplot2)
library(ggthemes)
library(data.table)
#####
# PCoA
#####
#e.g., qiime tools extract --input-path bray_curtis_pcoa_results.qza --output-path bray_curtis_extracte
datpc=read.table(file="M:/Genetic/Projects/Shukla_Microbiome_Seq/results/Robert/qiime2-2019.10/ms/core-r

ggplot(data=datpc, aes(x = PC1_15.10_percent, y = PC2_9.94_percent, color=category)) +
  theme_tufte() +
  geom_point(shape=20, size=6) +

  theme(

    text = element_text(size=35),
    axis.title.x = element_text(margin = margin(t = 15)),
    axis.title.y = element_text(margin = margin(r = 15)),

    legend.title = element_text(size=25),
    legend.text = element_text(size=20),

    panel.border = element_rect(colour = "black", fill=NA, size=2),
    plot.background = element_rect(color = "black", size = 1.5)
  )

```

```

) +
  coord_cartesian(xlim = c(-0.35, 0.40), ylim = c(-0.45, 0.20)) +

scale_color_manual(values=c("A1"="blue", "A3"="orange", "control"="red")) +
geom_point(shape = 1,size = 4,colour = "black")

```

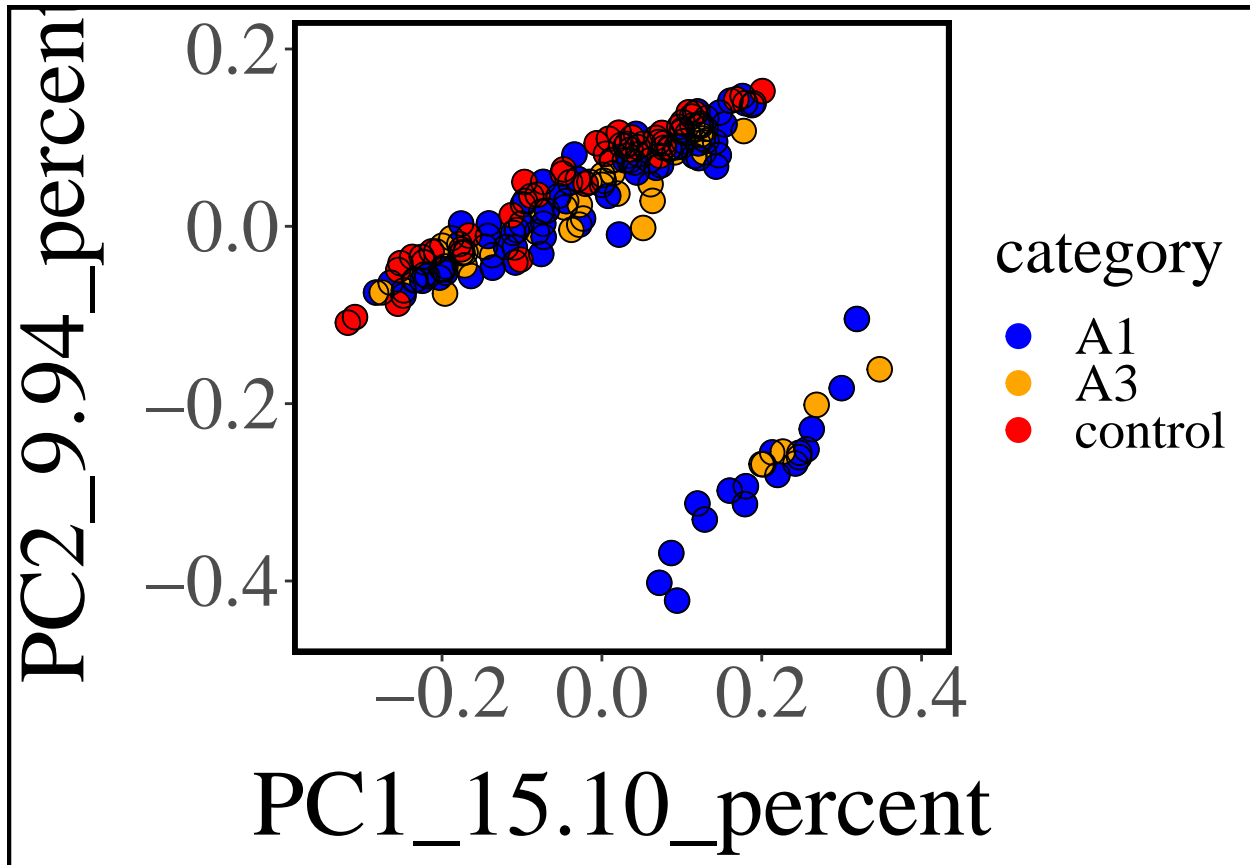

```

#####
# Relative abundance, Phylum
#####
imported_dat=read.csv(file="M:/Genetic/Projects/Shukla_Microbiome_Seq/results/Robert/qiime2-2019.10/ms/
dat=imported_dat

dat2b=list()

#datA=dat2[, grep("A$", colnames(dat2))]
dat2=dat[order(dat$Cluster),]
dat2=dat2[grep("big_cluster", dat2$Cluster),]
#dat3=dat2[, grep("^k_index", colnames(dat2))]
dat2=dat2[, grep("^k_index", colnames(dat2))]
dat2=t(dat2)
datAprop=prop.table(dat2, margin=2)
AMpd=rowMeans(datAprop, na.rm=TRUE)
AMpd=as.data.frame(AMpd)
AMpd$otu=rownames(AMpd)
dat2b[[1]]=AMpd

```

```

dat2b[[1]]$Sample = "big_cluster"
colnames(dat2b[[1]])=c("Abundance", "otu", "Sample")

dat2=dat[order(dat$Cluster),]
dat2=dat2[grep("small_cluster", dat2$Cluster),]
dat2=dat2[, grep("^k__index", colnames(dat2))]
dat2=t(dat2)
datLprop=prop.table(dat2, margin=2)
LMpd=rowMeans(datLprop, na.rm=TRUE)
LMpd=as.data.frame(LMpd)
LMpd$otu=rownames(LMpd)
dat2b[[2]]=LMpd
dat2b[[2]]$Sample = "small_cluster"
colnames(dat2b[[2]])=c("Abundance", "otu", "Sample")

l = list(dat2b[[1]], dat2b[[2]]) #*****
bd=rbindlist(l)

threshold=0.01

bd$otu[bd$Abundance < threshold] = "Rare_combined" #rename low frequency taxa to "Rare_combined"

bd$Sample=as.factor(bd$Sample)
bd$Sample=factor(bd$Sample, levels=c("big_cluster", "small_cluster")) #*****
bd$otu=as.factor(bd$otu)

levels(bd$otu)

```

```

## [1] "k__Archaea.p__Euryarchaeota"      "k__Bacteria.p__Actinobacteria"
## [3] "k__Bacteria.p__Bacteroidetes"      "k__Bacteria.p__Firmicutes"
## [5] "k__Bacteria.p__Proteobacteria"     "k__Bacteria.p__Verrucomicrobia"
## [7] "Rare_combined"

```

```

bd$otu=gsub("k__[:alnum:]]+\\.p__", "", bd$otu)
xt1=xtabs(formula=Abundance~otu+Sample, data=bd)
#####
# Relative abundance, Family
#####
imported_dat=read.csv(file="M:/Genetic/Projects/Shukla_Microbiome_Seq/results/Robert/qiime2-2019.10/ms/1
dat=imported_dat

dat2b=list()

dat2=dat[order(dat$Cluster),]
dat2=dat2[grep("big_cluster", dat2$Cluster),]
dat2=dat2[, grep("^k__index", colnames(dat2))]
dat2=t(dat2)
datAprop=prop.table(dat2, margin=2)
AMpd=rowMeans(datAprop, na.rm=TRUE)
AMpd=as.data.frame(AMpd)
AMpd$otu=rownames(AMpd)
dat2b[[1]]=AMpd
dat2b[[1]]$Sample = "big_cluster"

```

```

colnames(dat2b[[1]])=c("Abundance", "otu", "Sample")

dat2=dat[order(dat$Cluster),]
dat2=dat2[grep("small_cluster", dat2$Cluster),]
dat2=dat2[, grep("^k__index", colnames(dat2))]
dat2=t(dat2)
datLprop=prop.table(dat2, margin=2)
LMpd=rowMeans(datLprop, na.rm=TRUE)
LMpd=as.data.frame(LMpd)
LMpd$otu=rownames(LMpd)
dat2b[[2]]=LMpd
dat2b[[2]]$Sample = "small_cluster"
colnames(dat2b[[2]])=c("Abundance", "otu", "Sample")

l = list(dat2b[[1]], dat2b[[2]])
bd=rbindlist(l)

threshold=0.01

bd$otu[bd$Abundance < threshold] = "Rare_combined" #rename low frequency taxa to "Rare_combined"

bd$Sample=as.factor(bd$Sample)
bd$Sample=factor(bd$Sample, levels=c("big_cluster", "small_cluster"))
bd$otu=as.factor(bd$otu)

xt1=xtabs(formula=Abundance~otu+Sample, data=bd)
levels(bd$otu)

## [1] "k__Archaea.p__Euryarchaeota.c__Methanobacteria.o__Methanobacteriales.f__Methanobacteriaceae"
## [2] "k__Bacteria.p__Actinobacteria.c__Actinobacteria.o__Bifidobacteriales.f__Bifidobacteriaceae"
## [3] "k__Bacteria.p__Actinobacteria.c__Coriobacteriia.o__Coriobacteriales.f__Coriobacteriaceae"
## [4] "k__Bacteria.p__Bacteroidetes.c__Bacteroidia.o__Bacteroidales.f__Bacteroidaceae"
## [5] "k__Bacteria.p__Bacteroidetes.c__Bacteroidia.o__Bacteroidales.f__Prevotellaceae"
## [6] "k__Bacteria.p__Bacteroidetes.c__Bacteroidia.o__Bacteroidales.f__Rikenellaceae"
## [7] "k__Bacteria.p__Firmicutes.c__Bacilli.o__Lactobacillales.f__Streptococcaceae"
## [8] "k__Bacteria.p__Firmicutes.c__Clostridia.o__Clostridiales.f__"
## [9] "k__Bacteria.p__Firmicutes.c__Clostridia.o__Clostridiales.f__Clostridiaceae"
## [10] "k__Bacteria.p__Firmicutes.c__Clostridia.o__Clostridiales.f__Lachnospiraceae"
## [11] "k__Bacteria.p__Firmicutes.c__Clostridia.o__Clostridiales.f__Peptostreptococcaceae"
## [12] "k__Bacteria.p__Firmicutes.c__Clostridia.o__Clostridiales.f__Ruminococcaceae"
## [13] "k__Bacteria.p__Firmicutes.c__Clostridia.o__Clostridiales.f__Veillonellaceae"
## [14] "k__Bacteria.p__Firmicutes.c__Erysipelotrichi.o__Erysipelotrichales.f__Erysipelotrichaceae"
## [15] "k__Bacteria.p__Proteobacteria.c__Gammaproteobacteria.o__Enterobacteriales.f__Enterobacteriaceae"
## [16] "k__Bacteria.p__Verrucomicrobia.c__Verrucomicrobiae.o__Verrucomicrobiales.f__Verrucomicrobiaceae"
## [17] "Rare_combined"

bd$otu=gsub("k__[:alnum:]]+\\.p__[:alnum:]]+\\.c__[:alnum:]]+\\.o__[:alnum:]]+\\.f__", "", bd$otu)
bd1=bd[bd==""]<-"Other"
xt2=xtabs(formula=Abundance~otu+Sample, data=bd)
bd$otu=gsub("\\.", "", bd$otu)
#####
# Relative abundance, Genus
#####

```



```

imported_dat=read.csv(file="M:/Genetic/Projects/Shukla_Microbiome_Seq/results/Robert/qiime2-2019.10/ms/1
dat=imported_dat

dat2b=list()

dat2=dat[order(dat$Cluster),]
dat2=dat2[grep("big_cluster", dat2$Cluster),]
dat2=dat2[, grep("^k__|index", colnames(dat2))]
dat2=t(dat2)
datAprop=prop.table(dat2, margin=2)
AMpd=rowMeans(datAprop, na.rm=TRUE)
AMpd=as.data.frame(AMpd)
AMpd$otu=rownames(AMpd)
dat2b[[1]]=AMpd
dat2b[[1]]$Sample = "big_cluster"
colnames(dat2b[[1]])=c("Abundance", "otu", "Sample")

dat2=dat[order(dat$Cluster),]
dat2=dat2[grep("small_cluster", dat2$Cluster),]
dat2=dat2[, grep("^k__|index", colnames(dat2))]
dat2=t(dat2)
datLprop=prop.table(dat2, margin=2)
LMpd=rowMeans(datLprop, na.rm=TRUE)
LMpd=as.data.frame(LMpd)
LMpd$otu=rownames(LMpd)
dat2b[[2]]=LMpd
dat2b[[2]]$Sample = "small_cluster"
colnames(dat2b[[2]])=c("Abundance", "otu", "Sample")

l = list(dat2b[[1]], dat2b[[2]])
bd=rbindlist(l)

threshold=0.01

bd$otu[bd$Abundance < threshold] = "Rare_combined" #rename low frequency taxa to "Rare_combined"

bd$Sample=as.factor(bd$Sample)
bd$Sample=factor(bd$Sample, levels=c("big_cluster", "small_cluster"))
bd$otu=as.factor(bd$otu)

xt1=xtabs(formula=Abundance~otu+Sample, data=bd)
levels(bd$otu)

```

```

## [1] "k__Archaea.p__Euryarchaeota.c__Methanobacteria.o__Methanobacteriales.f__Methanobacteriaceae.g__
## [2] "k__Bacteria.p__Actinobacteria.c__Actinobacteria.o__Bifidobacteriales.f__Bifidobacteriaceae.g__
## [3] "k__Bacteria.p__Actinobacteria.c__Coriobacteriia.o__Coriobacteriales.f__Coriobacteriaceae.g__Co
## [4] "k__Bacteria.p__Bacteroidetes.c__Bacteroidia.o__Bacteroidales.f__Bacteroidaceae.g__Bacteroides"
## [5] "k__Bacteria.p__Bacteroidetes.c__Bacteroidia.o__Bacteroidales.f__Prevotellaceae.g__Prevotella"
## [6] "k__Bacteria.p__Bacteroidetes.c__Bacteroidia.o__Bacteroidales.f__Rikenellaceae.g__Alistipes"
## [7] "k__Bacteria.p__Firmicutes.c__Bacilli.o__Lactobacillales.f__Streptococcaceae.g__Streptococcus"
## [8] "k__Bacteria.p__Firmicutes.c__Clostridia.o__Clostridiales.f__g__"
## [9] "k__Bacteria.p__Firmicutes.c__Clostridia.o__Clostridiales.f__Clostridiaceae.g__Clostridium"

```

```

## [10] "k__Bacteria.p__Firmicutes.c__Clostridia.o__Clostridiales.f__Lachnospiraceae.__"
## [11] "k__Bacteria.p__Firmicutes.c__Clostridia.o__Clostridiales.f__Lachnospiraceae.g__"
## [12] "k__Bacteria.p__Firmicutes.c__Clostridia.o__Clostridiales.f__Lachnospiraceae.g__.Ruminococcus."
## [13] "k__Bacteria.p__Firmicutes.c__Clostridia.o__Clostridiales.f__Lachnospiraceae.g__Blautia"
## [14] "k__Bacteria.p__Firmicutes.c__Clostridia.o__Clostridiales.f__Lachnospiraceae.g__Coprococcus"
## [15] "k__Bacteria.p__Firmicutes.c__Clostridia.o__Clostridiales.f__Lachnospiraceae.g__Dorea"
## [16] "k__Bacteria.p__Firmicutes.c__Clostridia.o__Clostridiales.f__Lachnospiraceae.g__Roseburia"
## [17] "k__Bacteria.p__Firmicutes.c__Clostridia.o__Clostridiales.f__Peptostreptococcaceae.g__"
## [18] "k__Bacteria.p__Firmicutes.c__Clostridia.o__Clostridiales.f__Ruminococcaceae.g__"
## [19] "k__Bacteria.p__Firmicutes.c__Clostridia.o__Clostridiales.f__Ruminococcaceae.g__Faecalibacterium"
## [20] "k__Bacteria.p__Firmicutes.c__Clostridia.o__Clostridiales.f__Ruminococcaceae.g__Oscillospira"
## [21] "k__Bacteria.p__Firmicutes.c__Clostridia.o__Clostridiales.f__Ruminococcaceae.g__Ruminococcus"
## [22] "k__Bacteria.p__Firmicutes.c__Clostridia.o__Clostridiales.f__Veillonellaceae.g__Megasphaera"
## [23] "k__Bacteria.p__Firmicutes.c__Clostridia.o__Clostridiales.f__Veillonellaceae.g__Phascolarctobacterium"
## [24] "k__Bacteria.p__Firmicutes.c__Erysipelotrichi.o__Erysipelotrichales.f__Erysipelotrichaceae.g__"
## [25] "k__Bacteria.p__Proteobacteria.c__Gammaproteobacteria.o__Enterobacteriales.f__Enterobacteriaceae"
## [26] "k__Bacteria.p__Verrucomicrobia.c__Verrucomicrobiae.o__Verrucomicrobiales.f__Verrucomicrobiaceae"
## [27] "Rare_combined"

```

```

bd$otu=gsub("k__[:alnum:]+\.\.p__[:alnum:]+\.\.c__[:alnum:]+\.\.o__[:alnum:]+\.\.f__", "", bd$otu)
bd$otu=gsub("\.\.{2}", ".", bd$otu)
bd$otu=gsub("g__\.\.", "g__", bd$otu)
bd$otu=gsub("\.\._", "\.g__", bd$otu)
bd$otu=gsub("[:alpha:]+\.\.g__", "\.g__", bd$otu)
bd$otu=gsub("\.\.", "", bd$otu)

```

```

bd$otu=gsub("g__$", "Other", bd$otu)
bd$otu=gsub("g__", "", bd$otu)
xt2=xtabs(formula=Abundance-otu+Sample, data=bd)

```

```

#####
# The Quasi-Conditional Association Test using General Estimating Equations (QCAT-GEE)
#####

```

```

library(miLineage)
library(readxl)
otu_1_num_new <- read_excel("//mcrf1/MMRPublic/CHG/Shukla_Sanjay/Noha/MS Gut Microbiome/16s manuscript with gene")
Taxa <- read_excel("//mcrf1/MMRPublic/CHG/Shukla_Sanjay/Noha/MS Gut Microbiome/16s manuscript with gene")
cluster_NUM_new <- read_excel("//mcrf1/MMRPublic/CHG/Shukla_Sanjay/Noha/MS Gut Microbiome/16s manuscript with gene")
write.table(otu_1_num_new, file="otu1.txt")
write.table(Taxa, file="tax2.txt")
write.table(cluster_NUM_new, file="sam3.txt")

```

```

otu1.temp=read.table("otu1.txt")
tax2.temp=read.table("tax2.txt")
sam3.temp=read.table("sam3.txt")
# make the rownames and coloumn names of both taxa and otu tables
otu.temp.c <- otu1.temp[,-1]
rownames(otu.temp.c) <- otu1.temp [,1]

TAXA.temp.c <- tax2.temp[,-1]
rownames(TAXA.temp.c) <- tax2.temp [,1]
#match the two tables
otu1.reorde.nr = otu1.temp[,match( colnames(otu.temp.c), rownames(TAXA.temp.c ))]

```

```

#try to remove the column 1 again
OTU.N <- otu1.reorde.nr[,-1]
rownames(OTU.N ) <- otu1.reorde.nr [,1]
#changing files into matrix
sam3.temp.m=as.matrix(sam3.temp)
tax2.temp.m=as.matrix (tax2.temp)
OTU.N.M= as.matrix(OTU.N)
Taxa.temp.c.m=as.matrix(TAXA.temp.c)
QCAT_GEE(OTU.N.M, sam3.temp.m, 1, sam3.temp.m, 1, Taxa.temp.c.m, n.resample = 1000)

```

```

## $lineage.pval
## $lineage.pval$'Two-Part'
## ;f__Lachnospiraceae; f__[Mogibacteriaceae] f__[Paraprevotellaceae];
## Asymptotic 0.2840303 0.4475827 0.4388304
## Resampling 0.2178218 0.6039604 0.2574257
## f__[Tissierellaceae] f__[Weeksellaceae]; f__Actinomycetaceae;
## Asymptotic 0.13243551 0.7294255 0.1306931
## Resampling 0.05694306 0.5643564 0.3069307
## f__Bifidobacteriaceae; f__Christensenellaceae; f__Clostridiaceae;
## Asymptotic 0.6090512 0.8529113 0.6936501
## Resampling 0.6336634 0.8910891 0.8019802
## f__Coriobacteriaceae; f__Dehalobacteriaceae; f__Desulfovibrionaceae
## Asymptotic 0.6958833 0.3725796 0.4425977
## Resampling 0.7128713 0.4752475 0.4356436
## f__Dethiosulfovibrionaceae f__Enterobacteriaceae;
## Asymptotic 0.0000000 1.0000000
## Resampling 0.4554455 0.8316832
## f__Enterococcaceae; f__Erysipelotrichaceae;_ f__Fusobacteriaceae;
## Asymptotic 0.3327186 0.04637918 0.05367291
## Resampling 0.1584158 0.03496503 0.27722772
## f__Lachnospiraceae; f__Lactobacillaceae; f__Leuconostocaceae;
## Asymptotic 0.03263683 0.07353704 1.0000000
## Resampling 0.01998002 0.17821782 0.6138614
## f__Methanobacteriaceae; f__Micrococcaceae; f__mitochondria;__
## Asymptotic 0.1246455 0.5873185 0.5018789
## Resampling 0.1980198 0.6831683 0.4752475
## f__Moraxellaceae f__Pasteurellaceae f__Peptococcaceae
## Asymptotic 0.5870769 0.4034840 0.7458692
## Resampling 0.5049505 0.4158416 0.5643564
## f__Peptostreptococcaceae f__Porphyromonadaceae; f__Rikenellaceae;
## Asymptotic 0.1471925 0.000000000 0.3152025
## Resampling 0.4653465 0.008991009 0.4554455
## f__Ruminococcaceae f__Streptococcaceae; f__Synergistaceae
## Asymptotic 0.1357610 0.8624156 1.0000000
## Resampling 0.1683168 0.9504950 0.8811881
## f__Veillonellaceae;_ o__Actinomycetales o__Actinomycetales;
## Asymptotic 0.09364934 0.2756097 0.2523611
## Resampling 0.11388611 0.6435644 0.2673267
## o__Bacteroidales o__Bacteroidales; o__Burkholderiales
## Asymptotic 0.5722187 0.5102790 0.4088249
## Resampling 0.5544554 0.4158416 0.4653465
## o__Campylobacteriales o__Clostridiales o__Clostridiales;
## Asymptotic 0.2599374 0.1608367 0.1898919

```

```

## Resampling          0.3663366          0.1881188          0.2079208
## o__Lactobacillales; o__Pseudomonadales o__RB41; o__Synergistales
## Asymptotic          0.06968758          0.4186928 0.6119858          0.08590295
## Resampling          0.03096903          0.1782178 0.6336634          0.28712871
## ;c__Actinobacteria; ;c__Bacteroidia; c__[Chloracidobacteria];
## Asymptotic          0.4080308          0.02785103          0.6028992
## Resampling          0.4752475          0.06193806          0.7524752
## c__Actinobacteria; c__Alphaproteobacteria c__Bacilli;
## Asymptotic          0.7487855          0.9004887 0.1411682
## Resampling          0.7623762          1.0000000 0.2574257
## c__Bacteroidia; c__Betaproteobacteria c__Clostridia;
## Asymptotic          0.7680318          0.5625582 0.9380504
## Resampling          0.7722772          0.3168317 0.9702970
## c__Gammaproteobacteria c__Methanobacteria; c__Mollicutes
## Asymptotic          0.4708914          0.3043650 0.7889646
## Resampling          0.3663366          0.5346535 0.7128713
## ;p__Actinobacteria; ;p__Bacteroidetes; p__Acidobacteria;
## Asymptotic          0.2623209          0.5834591 0.6028992
## Resampling          0.3960396          0.5148515 0.6831683
## p__Actinobacteria p__Actinobacteria; p__Bacteroidetes;
## Asymptotic          1.0000000          0.5971405 0.8239869
## Resampling          0.6831683          0.6138614 0.6732673
## p__Cyanobacteria; p__Firmicutes p__Firmicutes; p__Proteobacteria
## Asymptotic          0.1439810          1.0000000 0.3087289          0.7056448
## Resampling          0.1782178          0.9405941 0.1584158          0.8514851
## p__Tenericutes p__Verrucomicrobia k__Archaea; k__Bacteria
## Asymptotic          0.3829985          1.0000000 1.0000000 0.6554995
## Resampling          0.3069307          0.7623762 0.9207921 0.6930693
## k__Bacteria; k__Bacteria;;
## Asymptotic          0.9281516          0.4777949
## Resampling          0.8415842          0.2772277
##
## $lineage.pval$'Zero-Part'
## ;f__Lachnospiraceae; f__[Mogibacteriaceae] f__[Paraprevotellaceae];
## Asymptotic          0.09382132          0.5384705          0.1964610
## Resampling          0.07920792          0.5742574          0.2673267
## f__[Tissierellaceae] f__[Weeksellaceae]; f__Actinomycetaceae;
## Asymptotic          0.09538992          0.4220440          0.1005584
## Resampling          0.10389610          0.5643564          0.1485149
## f__Bifidobacteriaceae; f__Christensenellaceae; f__Clostridiaceae;
## Asymptotic          0.4365587          0.7977349          0.5415020
## Resampling          0.5643564          0.7920792          0.7425743
## f__Coriobacteriaceae; f__Dehalobacteriaceae; f__Desulfovibrionaceae
## Asymptotic          0.5567653          0.8347001          0.5216133
## Resampling          0.6237624          0.8118812          0.5544554
## f__Dethiosulfovibrionaceae f__Enterobacteriaceae;
## Asymptotic          0.08124916          0.5795377
## Resampling          0.27722772          0.8613861
## f__Enterococcaceae; f__Erysipelotrichaceae; f__Fusobacteriaceae;
## Asymptotic          0.1818368          0.03763249          0.04850968
## Resampling          0.1584158          0.04495504          0.30693069
## f__Lachnospiraceae; f__Lactobacillaceae; f__Leuconostocaceae;
## Asymptotic          0.13198720          0.1446784          0.00524896
## Resampling          0.06793207          0.2376238          0.01980198

```

```

##          f__Methanobacteriaceae; f__Micrococcaceae; f__mitochondria;__
## Asymptotic          0.1088254          0.3812148          0.2272260
## Resampling          0.1485149          0.6831683          0.4752475
##          f__Moraxellaceae f__Pasteurellaceae f__Peptococcaceae
## Asymptotic          0.3809968          0.3679662          0.3682156
## Resampling          0.5049505          0.4158416          0.5643564
##          f__Peptostreptococcaceae f__Porphyromonadaceae; f__Rikenellaceae;
## Asymptotic          0.2077852          0.5921457          0.2664025
## Resampling          0.5049505          0.7952048          0.5445545
##          f__Ruminococcaceae f__Streptococcaceae; f__Synergistaceae
## Asymptotic          0.08871899          0.7549972          0.2442499
## Resampling          0.06930693          0.9009901          0.3861386
##          f__Veillonellaceae;_ o__Actinomycetales o__Actinomycetales;
## Asymptotic          0.01915199          0.3915299          0.1496140
## Resampling          0.01398601          0.6435644          0.2079208
##          o__Bacteroidales o__Bacteroidales; o__Burkholderiales
## Asymptotic          0.5012998          0.4667090          0.3714836
## Resampling          0.4950495          0.5148515          0.4851485
##          o__Campylobacterales o__Clostridiales o__Clostridiales;
## Asymptotic          0.1343794          0.09519889          0.3062991
## Resampling          0.3663366          0.11881188          0.4356436
##          o__Lactobacillales; o__Pseudomonadales o__RB41; o__Synergistales
## Asymptotic          0.02411998          0.2430058 0.6119858          0.04507757
## Resampling          0.02097902          0.1782178 0.6336634          0.26732673
##          ;c__Actinobacteria; ;c__Bacteroidia; c__[Chloracidobacteria];
## Asymptotic          0.3969771          0.4674793          0.3954117
## Resampling          0.3861386          0.4955045          0.7524752
##          c__Actinobacteria; c__Alphaproteobacteria c__Bacilli;
## Asymptotic          0.5436705          0.8478623 0.1553492
## Resampling          0.5940594          0.9900990 0.2277228
##          c__Bacteroidia; c__Betaproteobacteria c__Clostridia;
## Asymptotic          0.4765253          0.3592028          0.9621699
## Resampling          0.5544554          0.3168317          0.9702970
##          c__Gammaproteobacteria c__Methanobacteria; c__Mollicutes
## Asymptotic          0.3997031          0.2982684          0.5913214
## Resampling          0.4851485          0.5346535          0.7128713
##          ;p__Actinobacteria; ;p__Bacteroidetes; p__Acidobacteria;
## Asymptotic          0.9347141          0.3777401          0.3954117
## Resampling          0.9702970          0.4158416          0.7524752
##          p__Actinobacteria p__Actinobacteria; p__Bacteroidetes;
## Asymptotic          0.4162703          0.5705461          0.6043117
## Resampling          0.7029703          0.6633663          0.6732673
##          p__Cyanobacteria; p__Firmicutes p__Firmicutes; p__Proteobacteria
## Asymptotic          0.8384537          0.2823868          0.4237811          0.7265336
## Resampling          0.8811881          0.5742574          0.2574257          0.8514851
##          p__Tenericutes p__Verrucomicrobia k__Archaea; k__Bacteria
## Asymptotic          0.3096443          0.1236054 0.08040973          0.6520826
## Resampling          0.3069307          0.1485149 0.23762376          0.8514851
##          k__Bacteria; k__Bacteria;;
## Asymptotic          0.7454013          0.2884922
## Resampling          0.7920792          0.2772277
##
## $lineage.pval$'Positive-Part'
##          ;f__Lachnospiraceae; f__[Mogibacteriaceae] f__[Paraprevotellaceae];

```

|                                                                        |            |             |              |
|------------------------------------------------------------------------|------------|-------------|--------------|
| ## Asymptotic                                                          | 0.6839922  | 0.2335740   | 0.8012727    |
| ## Resampling                                                          | 0.5544554  | 0.3465347   | 0.3564356    |
| ## f__[Tissierellaceae] f__[Weeksellaceae]; f__Actinomycetaceae;       |            |             |              |
| ## Asymptotic                                                          | 0.3666457  | 1           | 0.3226310    |
| ## Resampling                                                          | 0.1188811  | 1           | 0.9009901    |
| ## f__Bifidobacteriaceae; f__Christensenellaceae; f__Clostridiaceae;   |            |             |              |
| ## Asymptotic                                                          | 0.6560446  | 0.5635300   | 0.6691836    |
| ## Resampling                                                          | 0.6237624  | 0.7623762   | 0.7920792    |
| ## f__Coriobacteriaceae; f__Dehalobacteriaceae; f__Desulfovibrionaceae |            |             |              |
| ## Asymptotic                                                          | 0.6646447  | 0.09635896  | 0.2818467    |
| ## Resampling                                                          | 0.6039604  | 0.06930693  | 0.2673267    |
| ## f__Dethiosulfovibrionaceae f__Enterobacteriaceae;                   |            |             |              |
| ## Asymptotic                                                          | 0.0000000  | 1.0000000   |              |
| ## Resampling                                                          | 0.4554455  | 0.8316832   |              |
| ## f__Enterococcaceae; f__Erysipelotrichaceae; f__Fusobacteriaceae;    |            |             |              |
| ## Asymptotic                                                          | 1          | 0.2581587   | 0.2052771    |
| ## Resampling                                                          | 1          | 0.2517483   | 0.4950495    |
| ## f__Lachnospiraceae; f__Lactobacillaceae; f__Leuconostocaceae;       |            |             |              |
| ## Asymptotic                                                          | 0.02996443 | 0.09731883  | 1.0000000    |
| ## Resampling                                                          | 0.02697303 | 0.21782178  | 0.6138614    |
| ## f__Methanobacteriaceae; f__Micrococcaceae; f__mitochondria;__       |            |             |              |
| ## Asymptotic                                                          | 0.2524055  | 1           | 1            |
| ## Resampling                                                          | 0.6831683  | 1           | 1            |
| ## f__Moraxellaceae f__Pasteurellaceae f__Peptococcaceae               |            |             |              |
| ## Asymptotic                                                          | 1          | 0.37812129  | 1            |
| ## Resampling                                                          | 1          | 0.03960396  | 1            |
| ## f__Peptostreptococcaceae f__Porphyromonadaceae; f__Rikenellaceae;   |            |             |              |
| ## Asymptotic                                                          | 0.1775988  | 0.000000000 | 0.37642634   |
| ## Resampling                                                          | 0.3762376  | 0.008991009 | 0.08910891   |
| ## f__Ruminococcaceae f__Streptococcaceae; f__Synergistaceae           |            |             |              |
| ## Asymptotic                                                          | 0.3891710  | 0.7007626   | 1.0000000    |
| ## Resampling                                                          | 0.3762376  | 0.7623762   | 0.8811881    |
| ## f__Veillonellaceae; o__Actinomycetales o__Actinomycetales;          |            |             |              |
| ## Asymptotic                                                          | 0.7467729  | 0.1576402   | 0.5200924    |
| ## Resampling                                                          | 0.9100899  | 0.2772277   | 0.6237624    |
| ## o__Bacteroidales o__Bacteroidales; o__Burkholderiales               |            |             |              |
| ## Asymptotic                                                          | 0.4311201  | 0.4926418   | 0.4022910    |
| ## Resampling                                                          | 0.4158416  | 0.3465347   | 0.2079208    |
| ## o__Campylobacteriales o__Clostridiales o__Clostridiales;            |            |             |              |
| ## Asymptotic                                                          | 1          | 0.4248456   | 0.1826122    |
| ## Resampling                                                          | 1          | 0.3762376   | 0.1584158    |
| ## o__Lactobacillales; o__Pseudomonadales o__RB41; o__Synergistales    |            |             |              |
| ## Asymptotic                                                          | 0.5033217  | 1           | NA 0.5278308 |
| ## Resampling                                                          | 0.3736264  | 1           | NA 0.9306931 |
| ## ;c__Actinobacteria; ;c__Bacteroidia; c__[Chloracidobacteria];       |            |             |              |
| ## Asymptotic                                                          | 0.3500689  | 0.005868675 | 1            |
| ## Resampling                                                          | 0.5445545  | 0.001998002 | 1            |
| ## c__Actinobacteria; c__Alphaproteobacteria c__Bacilli;               |            |             |              |
| ## Asymptotic                                                          | 0.7627721  | 0.6941734   | 0.2329870    |
| ## Resampling                                                          | 0.8712871  | 0.3168317   | 0.3168317    |
| ## c__Bacteroidia; c__Betaproteobacteria c__Clostridia;                |            |             |              |
| ## Asymptotic                                                          | 0.8846606  | 1           | 0.8153317    |
| ## Resampling                                                          | 0.8811881  | 1           | 0.7821782    |
| ## c__Gammaproteobacteria c__Methanobacteria; c__Mollicutes            |            |             |              |

```

## Asymptotic          0.4766181          0.2713594          1
## Resampling          0.2178218          0.1485149          1
##          ;p__Actinobacteria; ;p__Bacteroidetes; p__Acidobacteria;
## Asymptotic          0.04953742          1.0000000          1.0000000
## Resampling          0.03960396          0.7722772          0.8118812
##          p__Actinobacteria p__Actinobacteria; p__Bacteroidetes;
## Asymptotic          1.0000000          0.4588075          0.8283447
## Resampling          0.6831683          0.3168317          0.6732673
##          p__Cyanobacteria; p__Firmicutes p__Firmicutes; p__Proteobacteria
## Asymptotic          0.02448596          1.0000000          0.2415287          0.4859569
## Resampling          0.00990099          0.9405941          0.1485149          0.5247525
##          p__Tenericutes p__Verrucomicrobia k__Archaea; k__Bacteria
## Asymptotic          0.3988404          1.0000000          1.0000000          0.4977120
## Resampling          0.6138614          0.7623762          0.9207921          0.4356436
##          k__Bacteria; k__Bacteria;;
## Asymptotic          0.9037902          1
## Resampling          0.7524752          1
##
##
## $sig.lineage
## $sig.lineage$'Two-Part'
## character(0)
##
## $sig.lineage$'Zero-Part'
## character(0)
##
## $sig.lineage$'Positive-Part'
## character(0)
##
##
## $global.pval
##          Simes_Two-Part          Simes_Zero-Part Simes_Positive-Part
##          0.6381119          0.5104895          0.1438561

```
